# Supplementary material for: The diguanylate cyclase AdrA regulates flagellar biosynthesis in Pseudomonas fluorescens F113 through SadB
Source: PubMed Central journal article supplement (PMC6543031; doi:10.1038/s41598-019-44554-z), 2019-05-30
Supplement: 41598_2019_44554_MOESM1_ESM.pdf [file 41598_2019_44554_MOESM1_ESM.pdf]

## The identification of small molecule inhibitors of the plant inositol phosphorylceramide synthase which demonstrate herbicidal activity

Elizabeth C. Pinneh,<sup>1</sup> John G. Mina,<sup>2</sup> Michael J.R. Stark,<sup>3</sup> Stephen D. Lindell,<sup>4</sup> Peter Luemmen,<sup>4</sup> Marc R. Knight,<sup>2</sup> Patrick G. Steel<sup>1\*</sup> and Paul W. Denny<sup>2\*</sup>

### Supplementary Information 1

The sensitivity of different yeast strains to 320 compounds from the NCI Diversity set provided by the Drug Synthesis and Chemistry Branch, Developmental Therapeutics Program (Division of Cancer Treatment and Diagnosis, NIH) was examined by looking for growth inhibition of yeast cells cultured in 96-well plate format using plates with flat-bottomed wells. Each well was inoculated with 100  $\mu$ l YPD medium (per litre 10 g yeast extract, 20 g peptone, 20 g glucose) containing the indicated yeast strain at a concentration of  $10^5$  cells/ml. Wells in row 1 (top row of each plate in the Figure) received 1  $\mu$ l DMSO as a control, while wells in rows 2-11 each received 1  $\mu$ l of a 1 mM solution in DMSO of one of the 80 compounds from a plate of compounds chosen arbitrarily from the NIH Diversity Set, giving a final concentration of 10  $\mu$ M. The assay plates were incubated at 26°C for 24 hours and then each plate photographed after gentle mixing to resuspend the yeast cells. The Figure shows a montage of 96-well plate photographs assembled from three separate experiments as demarcated by the grey lines (note in each case that row 12 of the plate is not shown). Plates in each column contained the same indicated strain, while each row of plates received compounds from the same plate of compounds (set 1, compound plate 1410; set 2, compound plate 1417; set 3, compound plate 1401; set 4, compound plate 1402).

Wells showing substantial growth inhibition as indicated by reduced or absent cell density after incubation are highlighted by red circles in the Figure. Only 3/320 compounds inhibited growth of the control strain, while 32/320 inhibited growth of the quadruple *pdr1 $\Delta$  pdr3 $\Delta$  pdr16 $\Delta$  pdr17 $\Delta$*  strain indicating elevated drug hypersensitivity. The two double mutant combinations (*pdr1 $\Delta$  pdr3 $\Delta$*  and *pdr16 $\Delta$  pdr17 $\Delta$* ) each showed sensitivity to more compounds than the wild-type strain but to less than the quadruple mutant used in the *AtI*PCS2 screen.

The yeast strains used were as follows: Wild-type BY4742: *MAT $\alpha$  his3 $\Delta$ 1 leu2 $\Delta$ 0 lys2 $\Delta$ 0 ura3 $\Delta$ 0*); *pdr1 $\Delta$  pdr3 $\Delta$*  (MSY510-8A: *MAT $\alpha$  his3 $\Delta$ 1 leu2 $\Delta$ 0 met15 $\Delta$ 0 ura3 $\Delta$ 0 pdr1 $\Delta$ ::KanMX4 pdr3 $\Delta$ ::KanMX4*); *pdr16 $\Delta$  pdr17 $\Delta$*  (MSY512-16D: *MAT $\alpha$  his3 $\Delta$ 1 leu2 $\Delta$ 0 met15 $\Delta$ 0 ura3 $\Delta$ 0 pdr16 $\Delta$ ::KanMX4 pdr17 $\Delta$ ::KanMX4*), *pdr1 $\Delta$  pdr3 $\Delta$  pdr16 $\Delta$  pdr17 $\Delta$*  (CJY13-10A: *MAT $\alpha$  his3 $\Delta$ 1 leu2 $\Delta$ 0 lys2 $\Delta$ 0 ura3 $\Delta$ 0 pdr1 $\Delta$ ::KanMX4 pdr3 $\Delta$ ::KanMX4 pdr16 $\Delta$ ::NatRMX pdr17 $\Delta$ ::NatRMX*).

1

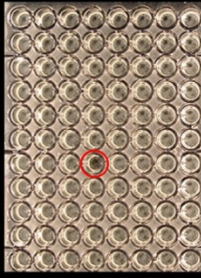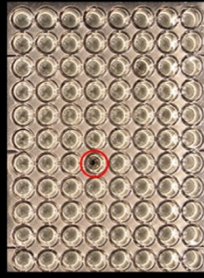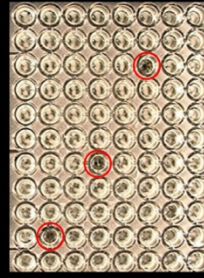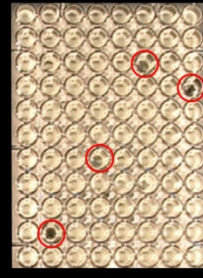

2

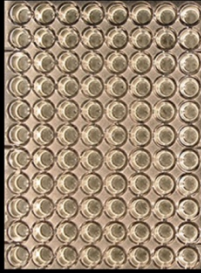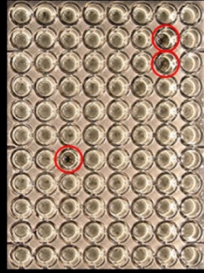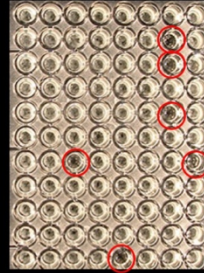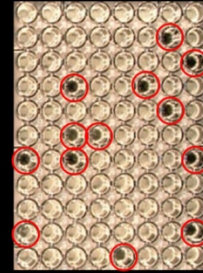

3

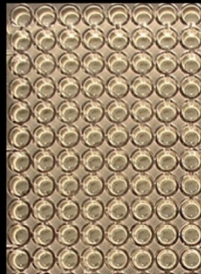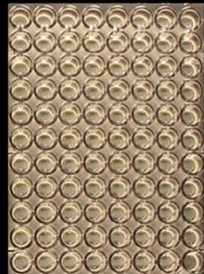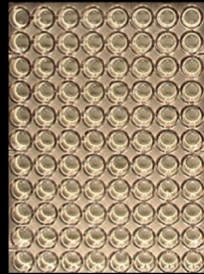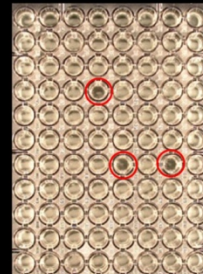

4

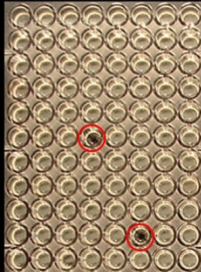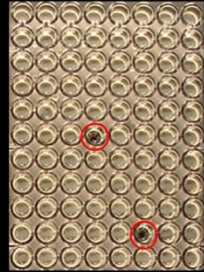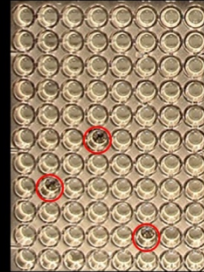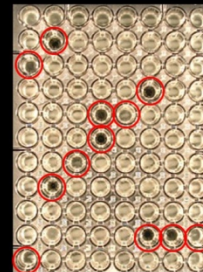

Wild-type

*pdr1Δ pdr3Δ*

*pdr16Δ pdr17Δ*

*pdr1Δ pdr3Δ*  
*pdr16Δ pdr17Δ*

## Supplementary Information 2

Yeast (MSYD23) dependent on expression of *AtIPCS1*, *AtIPCS2* and *AtIPCS3* from a galactose inducible promotor were, as expected, viable when grown in the presence of galactose (GAL), but not glucose (GLU). Subsequent focus was on *AtIPCS2*, the most highly expressed isoform in *Arabidopsis*.

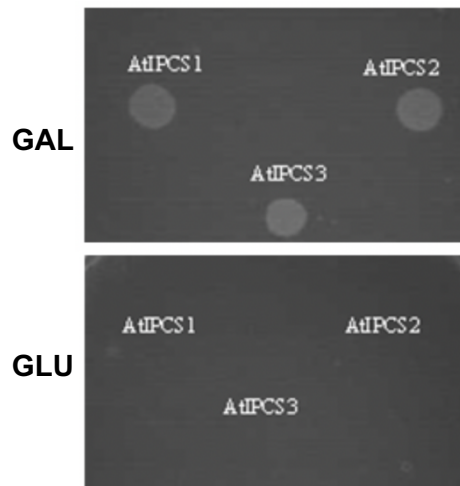

### **Supplementary Information 3**

Plot of the 106 hit compounds that demonstrated  $\geq 80\%$  inhibition and  $\geq 50\%$  selectivity for *AflPCS2* over *Aur1p* in the primary screen. Compounds were screened at 10  $\mu\text{M}$ . Data is mean of  $n=2$ .

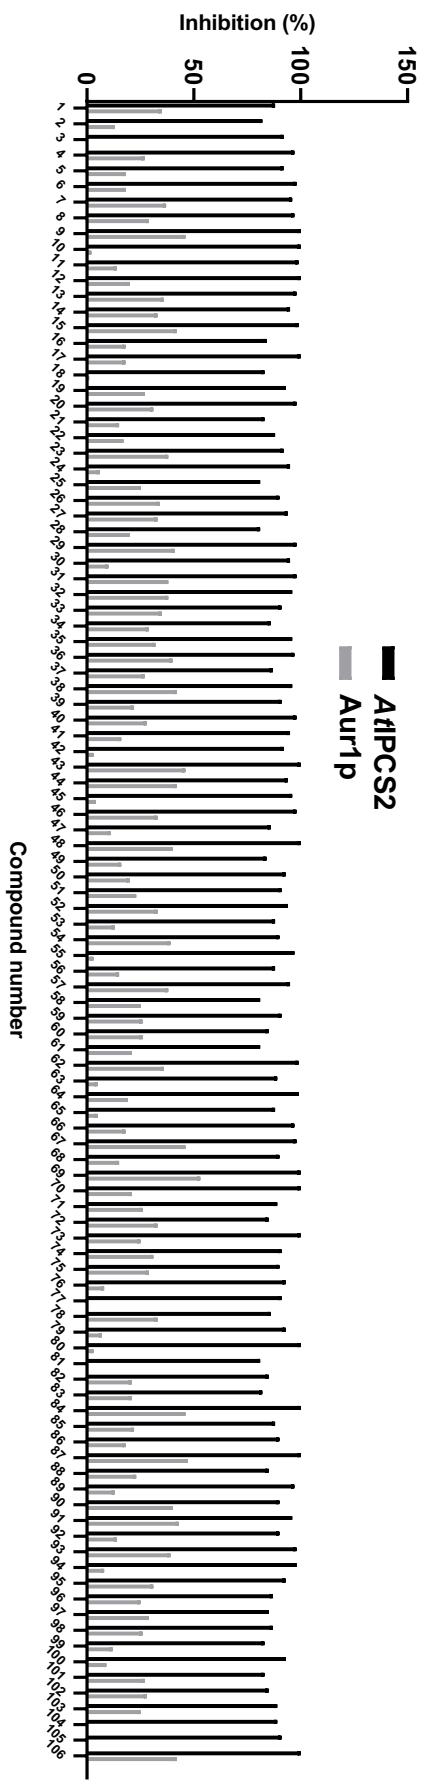

#### **Supplementary Information 4**

IC<sub>50</sub> curves of the 106 compounds (A-K) which showed selective inhibition of *AflPCS2* complemented yeast over *Aur1p* complemented yeast. Compounds were tested at a starting concentration of 50  $\mu$ M and serially diluted (1:3) to a final concentration of 68 nM. Compound inhibition was determined by measuring optical density of cells at 600 nm following 24 hours incubation with compound at 30°C, and relative inhibition calculated compared with controls. 89 of the 106 compounds had an IC<sub>50</sub> of less than 10  $\mu$ M. Data is mean of n=2 with standard deviation indicated. Graphs were plotted using GraphPad Prism 7 and [Inhibitor] vs. response (variable slope four parameter equation).

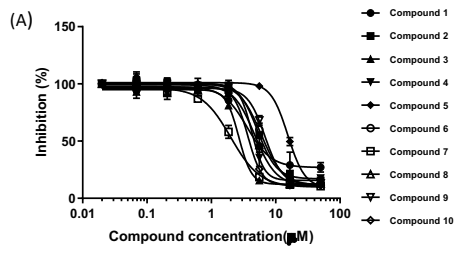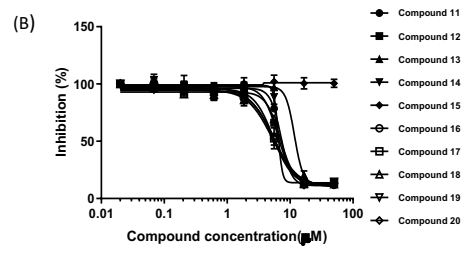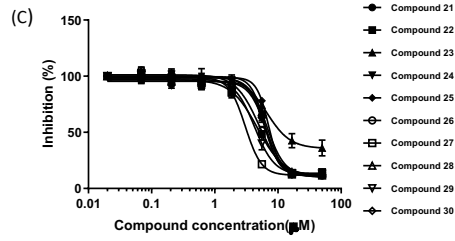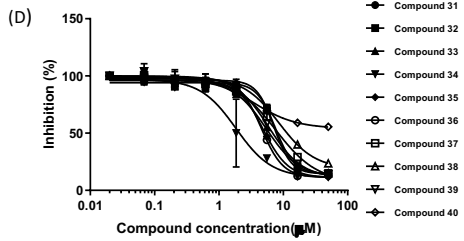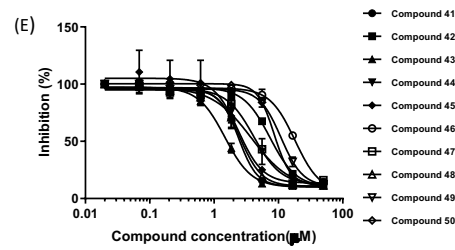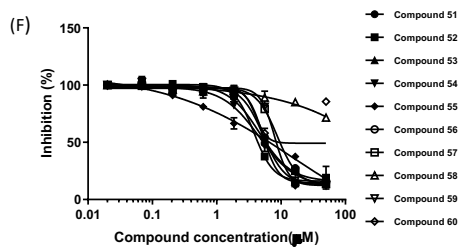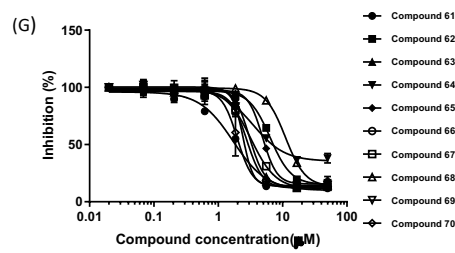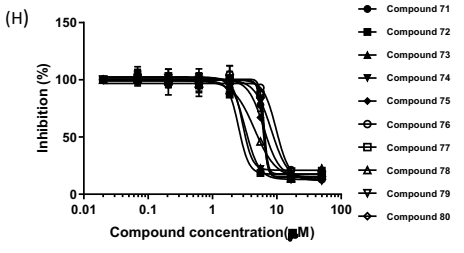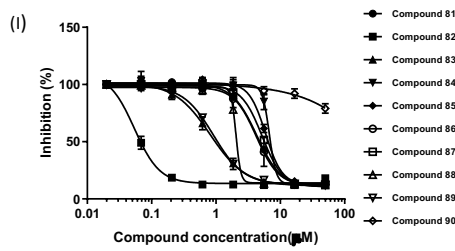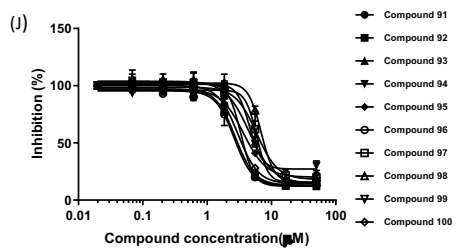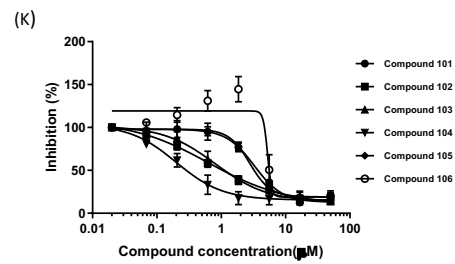

## Supplementary Information 5

IC<sub>50</sub> curves of the 4 compounds (the numbers equate to those in Supplementary Information 4) which showed significant inhibition (IC<sub>50</sub> < 10 μM) of *AtIPCS2* in the secondary, 96-well plate based, enzyme assay. None showed activity against *Aur1p* in the same platform. Compounds were tested at a starting concentration of 100 μM and serially diluted (1:3) to a final concentration of 46 nM. Data is mean of n=3 with standard deviation indicated. Graphs were plotted using GraphPad Prism 7 and [Inhibitor] vs. response (variable slope four parameter equation).

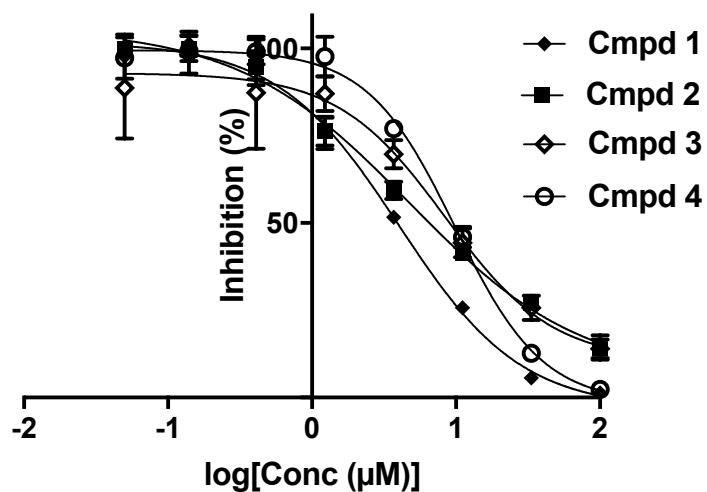



## Supplementary Information 6

A.

Analytical HPLC was conducted under neutral conditions using a Waters 2695 apparatus equipped with a reverse phase Triart C18 column (150 x 4.6 mm); gradient elution with MeCN/H<sub>2</sub>O; UV detector (210 nm). The purity of Compound 1 was ascertained to be 91%, inset table shows relative quantity of each peak. RT – Retention Time

B.

Accurate mass of major peak from A measured using a Waters Q-ToF Premier apparatus under electrospray ionization conditions.  $m/z$  [MH]<sup>+</sup> measured for major peak was 404.2695, within 1.7 parts per million of the calculated value (404.2702) for Compound 1 - C<sub>26</sub>H<sub>34</sub>N<sub>3</sub>O.

C.

NMR spectra were measured in DMSO-d<sub>6</sub> using a Bruker Advance III 600 MHz spectrometer with TMS as an internal standard. The <sup>1</sup>H NMR spectrum indicated that Compound 1 is a mixture of *E*:*Z* amidine isomers in a 3:2 ratio, respectively, as indicated by the doubling-up of many resonance signals: δ 0.89, 0.90 (2s, 9H, t-Bu), 1.40-1.62 (m, 6H, 3 x piperidyl-CH<sub>2</sub>), 2.00, 2.06, 2.12, 2.18 (4s, 6H, 2 x aryl-CH<sub>3</sub>), 2.65, 2.67 (2s, 2H, CH<sub>2</sub>), 3.30-3.60 (bm, 4H, 2 x piperidyl-CH<sub>2</sub>), 6.75-6.84 (m, 2H, 2 x aryl-H), 7.45 (s, 0.4H, amidine-CH, *Z*-isomer), 7.48 (m, 1H, aryl-H), 7.61 (s, 0.6H, amidine-CH, *E*-isomer). 7.74, 7.80 (2m, 2H, 2 x aryl-H).

**A**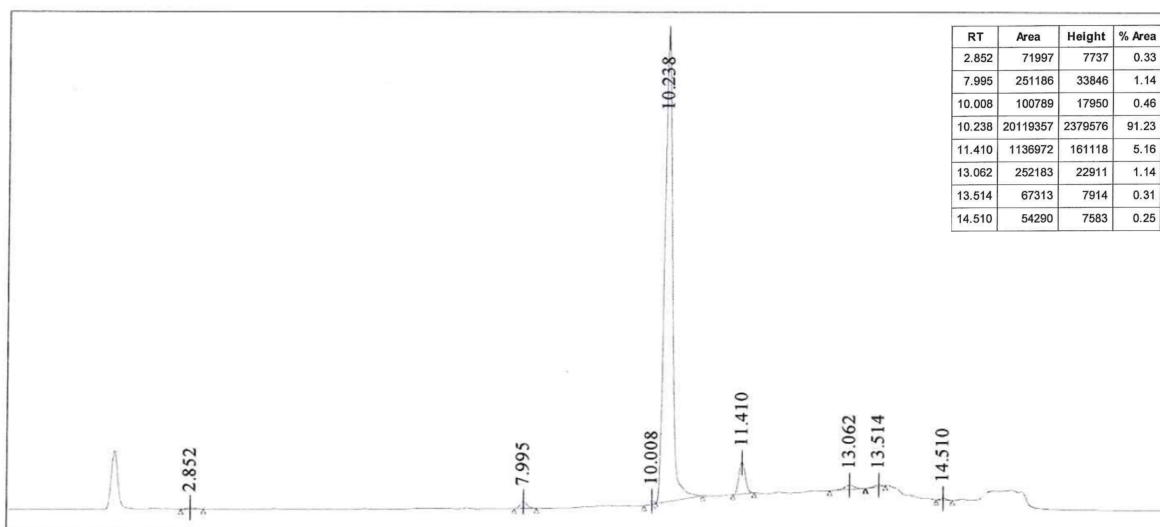**B**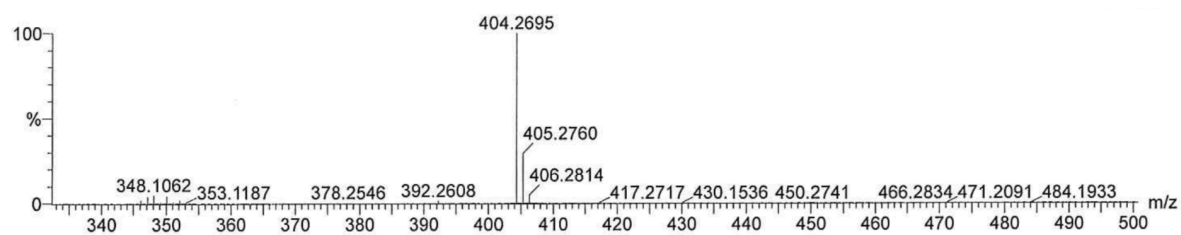

C

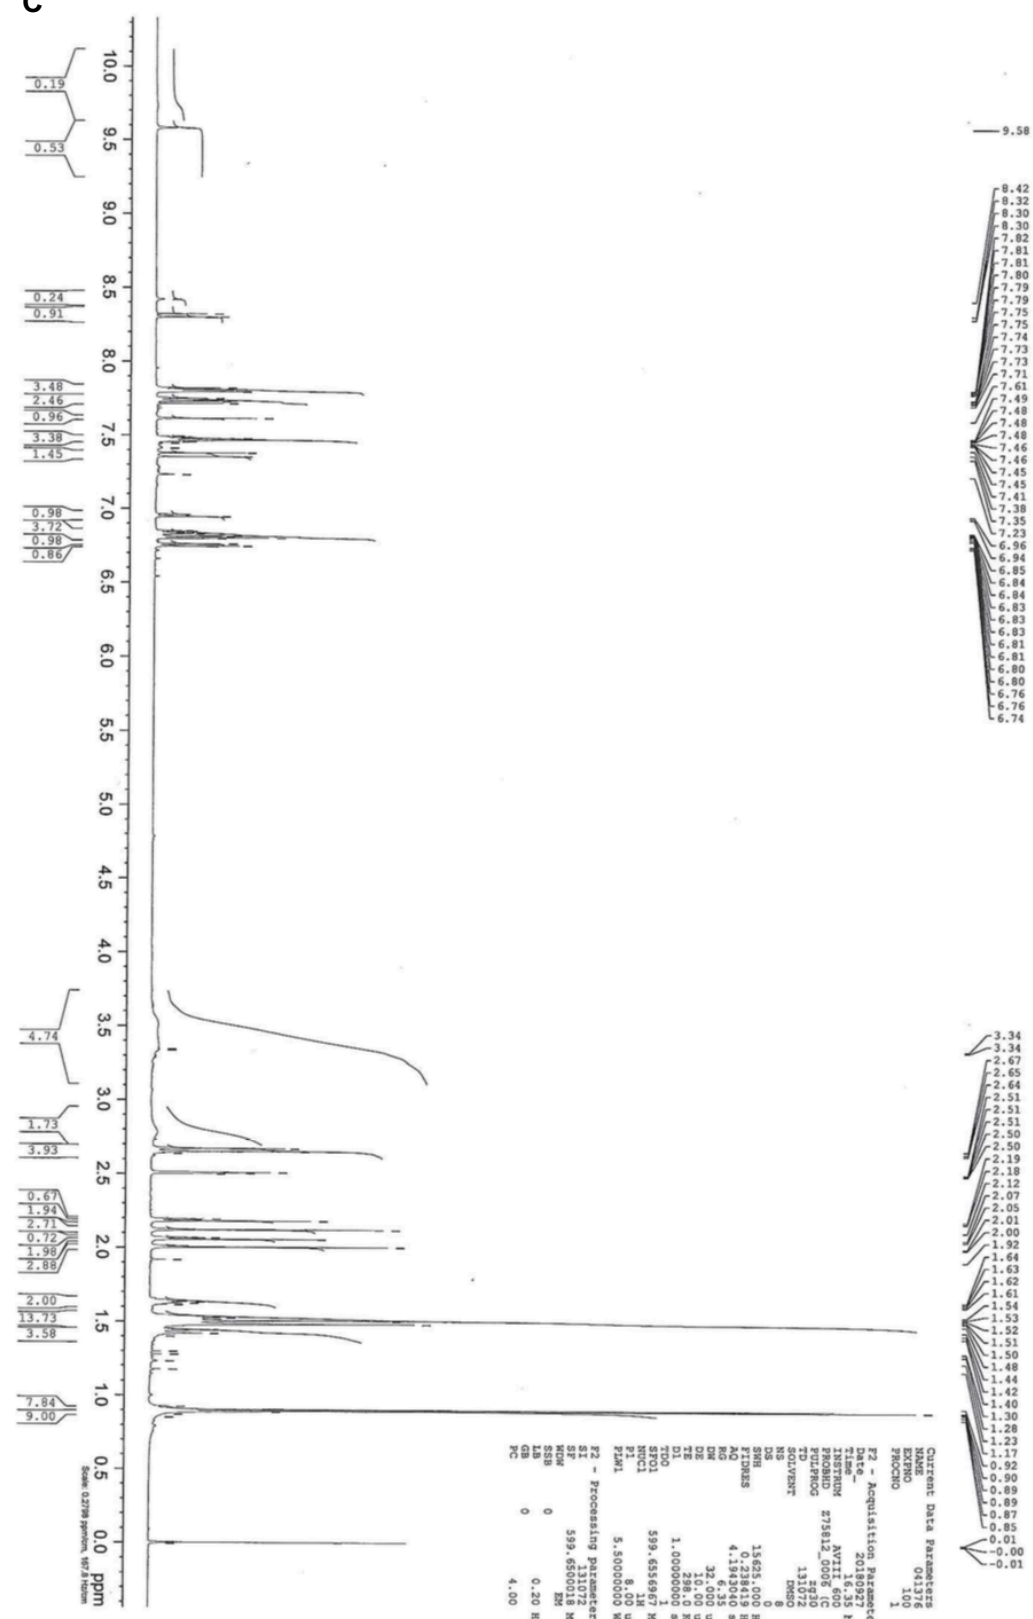

## Supplementary Information 7

Comparison of the protein sequence of AtIPCS2 with orthologues from both eudicot and monocot plants, using Clustal Omega alignment ([www.ebi.ac.uk](http://www.ebi.ac.uk)). A. Tree produced using the Simple Phylogeny tool (Distance Matrix using UPGMA clustering, distance correction and excluding gaps). Species names and associated accession numbers are indicated. B. Percent Identity Matrix from the same alignment data.

A

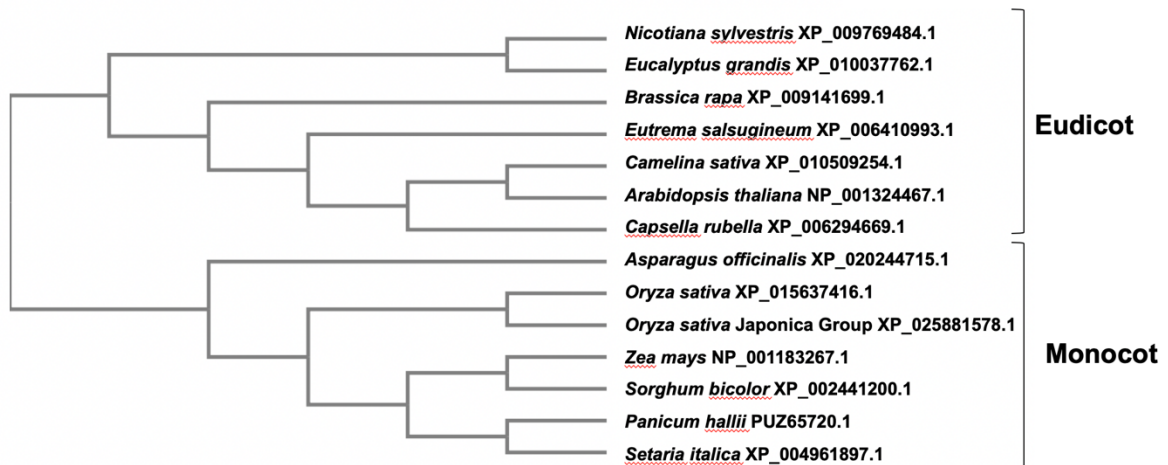

B

|                | 1                                | 2      | 3      | 4      | 5      | 6      | 7      | 8      | 9      | 10     | 11     | 12     | 13     | 14     |        |
|----------------|----------------------------------|--------|--------|--------|--------|--------|--------|--------|--------|--------|--------|--------|--------|--------|--------|
| <b>Eudicot</b> | 1: <i>Nicotiana sylvestris</i>   | 100.00 | 82.95  | 78.07  | 77.70  | 78.74  | 78.41  | 78.07  | 68.71  | 67.43  | 68.33  | 69.54  | 68.87  | 69.64  | 69.54  |
|                | 2: <i>Eucalyptus grandis</i>     | 82.95  | 100.00 | 80.66  | 82.33  | 82.30  | 81.64  | 81.97  | 72.58  | 69.87  | 70.59  | 70.00  | 69.35  | 70.42  | 70.32  |
|                | 3: <i>Brassica rapa</i>          | 78.07  | 80.66  | 100.00 | 95.67  | 93.44  | 94.75  | 93.77  | 69.87  | 67.43  | 68.68  | 68.21  | 67.88  | 67.33  | 67.55  |
|                | 4: <i>Eutrema salsugineum</i>    | 77.70  | 82.33  | 95.67  | 100.00 | 97.00  | 97.00  | 97.33  | 69.80  | 67.56  | 68.84  | 70.37  | 70.03  | 69.13  | 69.70  |
|                | 5: <i>Camelina sativa</i>        | 78.74  | 82.30  | 93.44  | 97.00  | 100.00 | 97.38  | 97.70  | 70.53  | 68.42  | 69.75  | 69.87  | 69.54  | 69.31  | 69.87  |
|                | 6: <i>Arabidopsis thaliana</i>   | 78.41  | 81.64  | 94.75  | 97.00  | 97.38  | 100.00 | 97.70  | 70.53  | 68.09  | 69.40  | 70.53  | 70.20  | 69.31  | 69.87  |
|                | 7: <i>Capsella rubella</i>       | 78.07  | 81.97  | 93.77  | 97.33  | 97.70  | 97.70  | 100.00 | 69.87  | 67.43  | 68.68  | 69.54  | 69.21  | 68.32  | 68.87  |
|                | 8: <i>Asparagus officinalis</i>  | 68.71  | 72.58  | 69.87  | 69.80  | 70.53  | 70.53  | 69.87  | 100.00 | 79.87  | 82.11  | 79.74  | 79.41  | 79.80  | 80.72  |
| <b>Monocot</b> | 9: <i>Oryza sativa</i>           | 67.43  | 69.87  | 67.43  | 67.56  | 68.42  | 68.09  | 67.43  | 79.87  | 100.00 | 100.00 | 89.34  | 89.03  | 91.25  | 91.85  |
|                | 10: <i>Oryza sativa Japonica</i> | 68.33  | 70.59  | 68.68  | 68.84  | 69.75  | 69.40  | 68.68  | 82.11  | 100.00 | 100.00 | 89.86  | 89.19  | 91.58  | 92.23  |
|                | 11: <i>Zea mays</i>              | 69.54  | 70.00  | 68.21  | 70.37  | 69.87  | 70.53  | 69.54  | 79.74  | 89.34  | 89.86  | 100.00 | 96.55  | 94.36  | 95.92  |
|                | 12: <i>Sorghum bicolor</i>       | 68.87  | 69.35  | 67.88  | 70.03  | 69.54  | 70.20  | 69.21  | 79.41  | 89.03  | 89.19  | 96.55  | 100.00 | 94.67  | 96.24  |
|                | 13: <i>Panicum hallii</i>        | 69.64  | 70.42  | 67.33  | 69.13  | 69.31  | 69.31  | 68.32  | 79.80  | 91.25  | 91.58  | 94.36  | 94.67  | 100.00 | 97.81  |
|                | 14: <i>Setaria italica</i>       | 69.54  | 70.32  | 67.55  | 69.70  | 69.87  | 69.87  | 68.87  | 80.72  | 91.85  | 92.23  | 95.92  | 96.24  | 97.81  | 100.00 |
